# Supplementary material
Source: Elsevier journal article supplement (https://www.sciencedirect.com/science/article/pii/S0213911114001071)
Supplement: mmc1 [file S0213911114001071:mmc1.doc]

Anexo I. Términos utilizados en las búsquedas bibliográficas

1. Medline a través de Pubmed

((((((((((((«Spain»[MeSH Terms] OR spain[Text Word] OR espagne[All Fields] OR espana[All Fields] OR spain[ad] OR espagne[ad] OR espana[ad]) OR osasunbidea[ad] OR osakidetza[ad] OR insalud[ad] OR sergas[ad] OR (catalunya[ad] OR catalonia[ad] OR catalogne[ad] OR cataluna[ad] OR catala[ad] OR (barcelon[ad] OR barcelona[ad] OR barcelone[ad] OR barcelones[ad] OR barceloneta[ad]) OR tarragona[ad] OR lleida[ad] OR lerida[ad] OR girona[ad] OR gerona[ad] OR sabadell[ad] OR hospitalet[ad] OR l’hospitalet[ad]) OR ((valencia[ad] OR valenciana[ad] OR valenciano[ad]) OR (castello[ad] OR castellon[ad]) OR alacant[ad] OR (alicant[ad] OR alicante[ad]) OR (murcia[ad] OR murcian[ad] OR murciana[ad] OR murciano[ad]) OR ((andalucia[ad] OR andaluciajunta[ad] OR andalusia[ad] OR andalusian[ad] OR andaluz[ad] OR andaluza[ad]) OR (sevill[ad] OR sevilla[ad] OR seville[ad]) OR (granada[ad] OR granade[ad]) OR huelva[ad] OR almeria[ad] OR cadiz[ad] OR jaen[ad] OR malaga[ad] OR (cordoba[ad] NOT (argentina[ad]) OR (extremadura[ad] OR caceres[ad] OR badajoz[ad]) OR madrid[ad] OR (castilla[ad] OR salamanca[ad] OR zamora[ad] OR valladolid[ad] OR segovia[ad] OR soria[ad] OR palencia[ad] OR avila[ad] OR burgos[ad] OR (leon[ad] NOT (france[ad] OR clermont[ad] OR rennes[ad] OR lyon[ad] OR USA[ad] OR (mexic[ad] OR mexica[ad] OR mexican[ad] OR mexicana[ad] OR mexicano[ad] OR mexicanos[ad] OR mexico[ad])) OR (galicia[ad] OR gallego[ad] OR compostela[ad] OR vigo[ad] OR coruna[ad] OR ferrol[ad] OR orense[ad] OR ourense[ad] OR pontevedra[ad]) OR (oviedo[ad] OR gijon[ad] OR (asturia[ad] OR asturiano[ad] OR asturias[ad] OR asturias’[ad])) OR (cantabria[ad] OR cantabrico[ad] OR cantabro[ad]) OR santander[ad]) OR (vasco[ad] OR euskadi[ad] OR basque[ad] OR bilbao[ad] OR bilbo[ad] OR (donosti[ad] OR donostia[ad]) OR vizcaya[ad] OR guipuzcoa[ad] OR gipuzkoa[ad] OR alava[ad] OR araba[ad] OR vitoria[ad]) OR (navarra[ad] OR navarro[ad]) OR pamplona[ad] OR iruna[ad] OR irunea[ad]) OR (aragon[ad] OR aragones[ad]) OR zaragoza[ad] OR teruel[ad] OR huesca[ad]) OR (mancha[ad] OR ciudad real[ad] OR albacete[ad] OR cuenca[ad] OR (toledo[ad] NOT (ohio[ad] OR us[ad] OR usa[ad] OR OH[ad]) OR (guadalajara[ad] NOT (mexic[ad] OR mexica[ad] OR mexican[ad] OR mexicana[ad] OR mexicano[ad] OR mexicanos[ad] OR OR mexico[ad])) OR ((balear[ad] OR balearen[ad] OR baleares[ad] OR balearic[ad] OR balears[ad] OR balearse[ad]) OR mallorca[ad] OR menorca[ad] OR ibiza[ad] OR eivissa[ad]) OR (palmas[ad] OR lanzarote[ad] OR canaria[ad] OR canarian[ad] OR canarias[ad] OR canario[ad]) OR tenerife[ad]))))

AND

("1985/01/01"[Date - Publication] : "2012/12/31"[Date - Publication])))

AND

(((Residence characteristics [MeSH Terms] OR Small-Area Analysis [MeSH Terms] OR Censuses [MeSH Terms] OR Area analyses [MeSH Terms] OR Multilevel [Title/Abstract] OR Ecologic* [Title/Abstract] OR Census* [Title/Abstract] OR Towns [Title/Abstract] OR Areas [Title/Abstract] OR Neighborhood* [Title/Abstract] OR Neighbourhood* [Title/Abstract] OR Regions [Title/Abstract] OR Provinces [Title/Abstract] OR Regional [Title/Abstract] OR Counties [Title/Abstract] OR place [Title/Abstract] OR Provincial [Title/Abstract] OR Cities [Title/Abstract] OR Autonomous Communities [Title/Abstract] )))))

AND

(((Socioeconomic factors [MeSH Terms] OR Poverty Areas [MeSH Terms] OR Poverty [MeSH Terms] OR inequalities [Title/Abstract] OR Deprivat* [Title/Abstract] OR Income [Title/Abstract] OR Social Environment [MeSH Terms] )) ))))))

2. *Science Citation Index Expanded* (SCI-EXPANDED) y *Social Sciences Citation Index* (SSCI) a través de *Web of Science*

(((TI=Spain OR CU=Spain)

AND

(TS=Residence characteristics OR TS=Small-Area Analysis OR TS=Censuses OR TS=Area analyses OR TI=Multilevel OR TI=Ecologic* OR TI=Census* OR TI=Towns OR TI=Areas OR TI=Neighborhood* OR TI=Neighbourhood* OR TI=Regions OR TI=Provinces OR TI=Regional OR TI=Counties OR TI=place OR TI=Provincial OR TI=Cities OR TI=Autonomous Communities)

AND

(TS=Socioeconomic factors OR TS=Poverty Areas OR TS=Poverty OR TI=inequalities OR TI=Deprivat* OR TI=Income OR TS=Social Environment)) OR (TI=Multilevel and TI=socio* and (TI=Spain or CU=Spain)))

AND

Document Types=(Article)

Databases=SCI-EXPANDED, SSCI Timespan=1985-2012

3. Embase

spain:ti OR spain:ca

AND

('residence characteristics':de OR 'small-area analysis':de OR censuses:de OR 'area analyses':de OR ecology:de OR 'geographic distribution':de OR urban:de OR multilevel:ti OR ecologic*:ti OR census*:ti OR towns:ti OR area:ti OR neighborhood*:ti OR neighbourhood*:ti OR regions:ti OR provinces:ti OR regional:ti OR counties:ti OR place:ti OR provincial:ti OR cities:ti OR 'autonomous communities':ti)

AND

(socioeconomics:de OR 'poverty areas':de OR poverty:de OR income:de OR inequalities:ti OR deprivat*:ti OR income:ti OR social:de)

AND

[article]/lim

AND

[humans]/lim

AND

[1985-2012]/py

4. Indice Médico Español

td has "ar"

and

(de has "análisis multinivel" or ti,rse has "multinivel", "ecologic*","cens*","ciudad*","municip*","barrio","distrito","provincia","region*","comunidad autónoma")

and

(de has "factores socioeconómicos", "pobreza","renta", "desigualdades en la salud" or ti,rse has "desigualdades","privación")
