# Supplementary material
Source: Elsevier journal article supplement (https://www.sciencedirect.com/science/article/pii/S0213911114001071)
Supplement: mmc2 [file S0213911114001071:mmc2.doc]

Anexo II. Artículos seleccionados

Aguilar I, Feja C, Compés ML, et al. Desigualdades y mortalidad por cirrosis en varones (Zaragoza, 1996-2003). Gac Sanit. 2011;25:139-45.

Aguilar I, Compés L, Feja C, et al.Gastric cancer incidence and geographical variations: the influence of gender and rural and socioeconomic factors, Zaragoza (Spain). Gastric Cancer. 2013;16:245-53.

Alberdi-Ordiozola JC, Sáenz-Bajo N. Factores determinantes de la derivación de atención primaria a las consultas externas de atención especializada en la Comunidad de Madrid. Aten Primaria. Aten Primaria. 2006;37: 253-7.

Alfonso JL, Vich FA, Vilata JJ, et al.Factors contributing to the decline of leprosy in Spain in the second half of the twentieth century. Int J Lepr Other Mycobact Dis. 2005;73:258-68.

Arias A, Rebagliato M, Palumbo MA, et al. Desigualdades en salud en Barcelona y Valencia. Med Clin (Barc). 1993;100: 281-7.

Barcelo MA, Saez M, Saurina C. Spatial variability in mortality inequalities, socioeconomic deprivation, and air pollution in small areas of the Barcelona Metropolitan Region, Spain. Science of the Total Environment. 2009;407:5501-23.

Barriuso Lapresa L, Sanz Barbero B. Análisis multinivel del uso de servicios de salud bucodental por población infanto-juvenil. Gac Sanit. 2011;25:391-96.

Benach J, Yasui Y. Geographical patterns of excess mortality in Spain explained by two indices of deprivation. J Epidemiol Community Health. 1999;53:423-31.

Benach J, Yasui Y, Borrell C, Sáez M, et al. Material deprivation and leading causes of death by gender: Evidence from a nationwide small area study. J Epidemiol Community Health. 2001;55: 239-45.

Benach J, Yasui Y, Borrell C, Pasarín MI, et al. The public health burden of material deprivation: excess mortality in leading causes of death in Spain. Prev Med. 2003;36: 300-8.

Bolivar J, Daponte A, Rodríguez M et al. The influence of individual, social and physical environment factors on physical activity in the adult population in Andalusia, Spain. Int J Environ Res Public Health. 2010;7:60-77.

Borda A, Sanz B, Otero L, et al. Tiempo de viaje y participación en el cribado del cáncer de mama en una región de alta dispersión poblacional. Gac Sanit. 2011;25:151-6.

Borrell C, Arias A. Socioeconomic factors and mortality in urban settings: the case of Barcelona, Spain. J Epidemiol Community Health. 1995;49:460-5.

Borrell C, Plasencia A, Pasarin I, et al. Widening social inequalities in mortality: the case of Barcelona, a southern European city. J Epidemiol Community Health. 1997;51: 659-67.

Borrell C, Rodríguez M, Ferrando J et al. Role of individual and contextual effects in injury mortality: new evidence from small area analysis. Inj Prev 2002;8:297-302.

Borrell C, Marí-dell’olmo M, Serral G, et al. Inequalities in mortality in small areas of eleven Spanish cities (the multicenter MEDEA project). Health Place. 2010;16: 703-11.

Broner S, Torner N, Domínguez A, et al. Sociodemographic inequalities and outbreaks of foodborne diseases: An ecologic study. Food Control. 2010;21: 947-51.

Brugal MT, Domingo-Salvany A, Maguire A, et al. A small area analysis estimating the prevalence of addiction to opioids in Barcelona, 1993. J Epidemiol Community Health. 1999;53: 488-94.

Brugal MT, Borrell C, Díaz-Quijano E, et al. Deprivation and AIDS in a southern European city: different patterns across transmission group. Eur J Public Health. 2003; 13:259-61.

Cambra K, Martínez-Rueda T, Alonso-Fustel E, et al. Mortality in small geographical areas and proximity to air polluting industries in the Basque Country (Spain). Occup Environ Med. 2011;68:140-7.

Cambra K, Martínez-Rueda T, Alonso-Fustel E, et al. Association of proximity to polluting industries, deprivation and mortality in small areas of the Basque Country (Spain). Eur J Public Health. 2013; 23:171-6.

Cano-Serral G, Azlor E, Rodríguez-Sanz M, et al. Socioeconomic inequalities in mortality in Barcelona: a study based on census tracts (MEDEA Project). Health Place. 2009;15:186-92.

Casanova C, Starfield B. Hospitalizations of children and access to primary care: a cross-national comparison. Int J Health Serv. 1995;25: 283-94.

Casanova-Matutano C, Peiró-Pérez R, Barba-Albós G. Hospitalización pediátrica evitable en la Comunidad Valenciana y Cataluña. Gac Sanit. 1998;12:160-8.

Casi Casanellas A, Moreno Iribas C. Desigualdad ante la muerte: estudio comparativo entre comunidades de Navarra en el segmento de población de 25 a 74 años. Aten Primaria. 1992;10:543-8.

Córdoba-Doña JA, Novalbos-Ruiz JP, Suárez-Farfante J, et al. "Social inequalities in HIV-TB and non-HIV-TB patients in two urban areas in southern Spain: multilevel analysis." Int J Tuberc Lung Dis. 2012;16: 342-7.

Corella D, Cortina P, Guillén M, et al. Dietary habits and geographic variation in stomach cancer mortality in Spain. Eur J Cancer Prev. 1996;5: 249-57.

Dadvand P, de Nazelle A, Figueras F, et al. Green space, health inequality and pregnancy. Environ Int. 2012;40: 110-5.

Dalmau-Bueno A, García-Altés A, Marí-Dell’Olmo M, et al. Veintidós años de evolución de las desigualdades socioeconómicas en la mortalidad en la ciudad de Barcelona. Gac Sanit. 2010;24:20-7.

Dalmau-Bueno A, García-Altés A, Marí-Dell’Olmo M, et al. Trends in socioeconomic inequalities in cirrhosis mortality in an urban area of Southern Europe: a multilevel approach. J Epidemiol Community Health. 2010;64:720-27.

Daponte-Codina A, Bolívar-Muñoz J, Toro-Cárdenas S, et al. Area deprivation and trends in inequalities in self-rated health in Spain, 1987-2001. Scand J Public Health. 2008;36:504-15.

Daponte-Codina A, Bolívar-Muñoz J, Ocaña-Riola R. Patterns of smoking according to individual social position, and to socio-economic environment in municipal areas, Spain 1987-2001. Health Place. 2009;15:679-86.

Díaz de Quijano E, Brugal MT, Pasarín MI, et al. Influencia de las desigualdades sociales, la conflictividad social y la pobreza extrema sobre la morbilidad por tuberculosis en la ciudad de Barcelona. Rev Esp Salud Pública. 2001;75:517-27.

Domínguez-Berjón MF, Benach J, García-Arcal MD, et al. Infant and perinatal mortality in Spain 1981-1991: interprovincial variations in Autonomous Communities with extreme economic levels. Eur J Epidemiol. 1999;15:723-9.

Domínguez-Berjón MF, Borrell C, Pastor V. Desigualdades en salud y educación: nivel de estudios individual vs instrucción insuficiente en el área de residencia. Medicina Preventiva. 2003; 9: 11-19.

Domínguez-Berjón MF, Borrell C, Pastor V. Indicadores socioeconómicos de área pequeña en el estudio de las desigualdades en salud. Gac Sanit. 2004;18:92-100.

Domínguez-Berjón MF, Borrell C, López R, et al. Mortality and socioeconomic deprivation in census tracts of an urban setting in southern Europe. J Urban Health. 2005;82:225-36.

Domínguez-Berjón MF, Borrell C. Mortalidad y privación socioeconómica en las secciones censales y los distritos de Barcelona. Gac Sanit. 2005;19:363-9.

Domínguez-Berjón MF, Borrell C, Rodríguez-Sanz M,et al. The usefulness of area-based socioeconomic measures to monitor social inequalities in health in Southern Europe. Eur J Public Health. 2006;16:54-61.

Domínguez- Berjón MF, Borrell C, Cano-Serral G, et al. Construcción de un índice de privación a partir de datos censales en grandes ciudades españolas (Proyecto MEDEA). Gac Sanit. 2008;22:179-87.

Domínguez-Berjón MF, Gandarillas A, Segura del Pozo J, et al. Census tract socioeconomic and physical environment and cardiovascular mortality in the Region of Madrid (Spain). J Epidemiol Community Health. 2010;64:1086-93.

Esnaola S, Aldasoro E, Ruiz R, et al. Desigualdades socioeconómicas en la mortalidad en la Comunidad Autónoma del País Vasco Gac Sanit. 2006;20:16-24.

Esnaola S, Montoya I, Calvo M, et al. Desigualdades socioeconómicas en la mortalidad en el País Vasco y sus capitales: un análisis de áreas geográficas pequeñas (Proyecto MEDEA). Estudios Geográficos. 2009;70:443-62.

Feja Solana C, Alcalá Narvaiz JT, Rabanaque Hernández MJ, et al. Desigualdades geográficas en mortalidad e incidencia por cáncer de laringe en varones: factores socioeconómicos y ambientales. Rev Esp Salud Pública. 2010;84:745-56.

Ferrando J, Rodríguez-Sanz M, Borrell C, et al. Individual and contextual effects in injury morbidity in Barcelona (Spain). Accid Anal Prev. 2005;37:85-92.

Ferreira Antunes JL, Borrell C, Pérez G, et al. Inequalities in mortality of men by oral and pharyngeal cancer in Barcelona, Spain and Sao Paulo, Brazil, 1995-2003. International Journal for Equity in Health. 2008;7:14.

Ferreira Antunes JL, Borrell C, Rodríguez-Sanz C, et al. Sex and socioeconomic inequalities of lung cancer mortality in Barcelona, Spain and Sao Paulo, Brazil. Eur J Cancer Prev. 2008;17: 399-405.

Fitch-Warner K, García de Yébenes MJ, Lázaro P et al. Variabilidad entre comunidades autónomas en el uso de tres tecnologías cardiovasculares. Rev Esp Cardiol. 2006;59:1232-43.

Gandarillas A, Domínguez-Berjón MF, Zorrilla B, et al. Deaths in collective dwellings and inequalities in small-area mortality: an ecological study in the Madrid region (Spain). J Epidemiol Community Health. 2011;65: 310-4.

Garcia E, Vioque J. Cobertura vacunal en los distritos de la ciudad de Castellón y su relación con factores sociodemográficos: un estudio ecológico. Med Clin (Barc). 1993;101:333-7.

García-Gil C, Cruz-Rojo C, Álvarez-Girón M, et al. Health inequalities in Seville, Spain: use of indicators of social deprivation and mortality in small areas. Public Health. 2004;118:11-20.

García Pérez MA, Martín Moreno V, Ramírez Puerta D, et al. Factores socioeconómicos y frecuentación en las consultas de medicina de familia de la red sanitaria pública madrileña. Gac Sanit. 2007;21:219-26.

García-Rey C, Fenoll A, Aguilar L, et al. Effect of social and climatological factors on antimicrobial use and Streptococcus pneumoniae resistance in different provinces in Spain. J Antimicrob Chemother. 2004;54:465-71.

García-Subirats I, Pérez G, Rodríguez-Sanz M, et al. Recent immigration and adverse pregnancy outcomes in an urban setting in Spain. Matern Child Health J. 2011;15:561-9.

García-Subirats I, Pérez G, Rodríguez-Sanz M, et al. Neighborhood inequalities in adverse pregnancy outcomes in an urban setting in Spain: a multilevel approach. J Urban Health. 2012;89:447-63.

Gispert Magarolas R, Puig Oriol X, Palomera Fanegas E, et al. Factores individuales y del entorno asociados a la variabilidad geográfica de los trastornos psicológicos entre áreas pequeñas: un análisis multinivel. Rev Esp Salud Pública. 2006;80:335-47.

Gispert Magarolas R, Clot-Razquin G, March-Llanes J, et al. Prevalencia de la discapacidad en España por Comunidades Autónomas: el papel de los factores individuales y del entorno geográfico en su variabilidad. Rev Esp Salud Pública. 2009;83:821-34.

González-Quintela A, Fernández-Conde S, Alves MT, et al. Temporal and spatial patterns in the rate of alcohol withdrawal syndrome in a defined community. Alcohol. 2011;45:105-11.

Gotsens M, Marí Dell’Olmo M, Martínez-Beneito MA, et al. Socio-economic inequalities in mortality due to injuries in small areas of ten cities in Spain (MEDEA Project). Accid Anal Prev. 2011;43:1802-10.

Guallar-Castillón P, Rodríguez Artalejo F, Banegas Banegas JR, et al. Factores ambientales en la vida temprana y nnivel socioeconómico en la actualidad: ¿cuál es más importante para la mortalidad cardiovascular en España. Med Clin (Barc). 1999;113:444-6.

Gutiérrez-Fisac JL, Rodríguez-Artalejo F, Guallar-Castillón P, et al. Determinants of geographical variations in body mass index (BMI) and obesity in Spain. Int J Obes Relat Metab Disord. 1999;23: 342-7.

Gutiérrez-Fisac JL, Gispert R, Sola J. Factors explaining the geographical differences in Disability Free Life Expectancy in Spain. J Epidemiol Community Health. 2000;54: 451-5.

Jiménez-Puente A, Perea-Milla E, Rivas-Ruiz F. Distribución y tendencia de los fallecimientos en el medio hospitalario en España durante el periodo 1997-2003. Rev Esp Salud Pública. 2006;80:377-85.

Karlsdotter K, Martín Martín JJ, López del Amo González MP. Influencia de la renta, la desigualdad de renta y el capital social en la salud de los mayores de 65 años en España en 2007. Gac Sanit. 2011; 25 (Supl 2): 59-65.

Karlsdotter K, Martín Martín JJ, López del Amo González MP. Multilevel analysis of income, income inequalities and health in Spain. Soc Sci Med. 2012;74:1099-106.

Lardelli P, Masa J, Maderuelo A, et al. Infant, neonatal, postneonatal and perinatal mortality in Spain, 1975-1984. Interregional and interannual differences. Soc Sci Med. 1991;33: 613-20.

Lardelli P, de la Fuente L, Alonso JM, et al. Geographical variations in the prevalence of HIV infection among drug users receiving ambulatory treatment in Spain. Int J Epidemiol. 1993;22:306-14.

Larrañaga I, Arteagoitia JM, Rodríguez JL, et al. Socio-economic inequalities in the prevalence of Type 2 diabetes, cardiovascular risk factors and chronic diabetic complications in the Basque Country, Spain. Diabet Med. 2005;22:1047-53.

Lertxundi-Manterola A, Saurina C, Saez M, et al. Construcción de un índice de privación material para los municipios de la Región Sanitaria Girona. Estudios de Economía Aplicada. 2005;23:331-53.

López-Abente G, Aragonés N, Pollán M, et al. Leukemia, lymphomas, and myeloma mortality in the vicinity of nuclear power plants and nuclear fuel facilities in Spain. Cancer Epidemiol Biomarkers Prev. 1999;8: 925-34.

López-Abente G, Aragonés N, Pollán M. Solid-tumor mortality in the vicinity of uranium cycle facilities and nuclear power plants in Spain. Environ Health Perspect. 2001;109:721-9.

Loza E, Abásolo L, Clemente D, et al. Variability in the use of orthopedic surgery in patients with rheumatoid arthritis in Spain. J Rheumatol. 2007;34:1485-90.

Machón M, Aldasoro E, Martínez-Camblor P, et al. Socioeconomic differences in incidence and relative survival after a first acute myocardial infarction in the Basque Country, Spain. Gac Sanit. 2012;26:16-23.

Magán Tapia P, Alberquilla Menéndez Asenjo A, Ribera Casado JM, et al. Diferencias en la mortalidad de la población mayor de 65 años en un área sanitaria de la Comunidad de Madrid. Aten Primaria. 2006;38:443-9.

Magán P, Alberquilla A, Otero A, et al. Hospitalizations for ambulatory care sensitive conditions and quality of primary care: their relation with socioeconomic and health care variables in the Madrid regional health service (Spain). Med Care. 2011;49:17-23.

Mari-Dell'Olmo M, Rodríguez-Sanz M, García-Olalla P, et al. Individual and community-level effects in the socioeconomic inequalities of AIDS-related mortality in an urban area of southern Europe. J Epidemiol Community Health. 2007;61:232-40.

Márquez-Calderón S, Rodríguez del Águila MM, Perea-Milla E, et al. Factores asociados a la hospitalización por procesos sensibles a cuidados ambulatorios en los municipios. Gac Sanit. 2003;17:360-7.

Márquez-Calderón S, Rodríguez Rodríguez M. Influencia de la población inmigrante e la variabilidad de la tasa de abortos entre comunidades autónomas. Gac Sanit. 2009;23 (Supl 1):72-3.

Martín Santos FJ, March Cerdá JC. Desigualdades sociales en salud en la ciudad de Málaga. Gac Sanit. 1992;6:198-206.

Merlo J, Viciana-Fernández FJ, Ramiro-Fariñas D. Bringing the individual back to small-area variation studies: A multilevel analysis of all-cause mortality in Andalusia, Spain. Soc Sci Med. 2012;75:1477-87.

Morales Suárez-Varela MM, Llopis González A, Sanz Aliaga SA et al. Aten Primaria. 1992;9:472-6.

Morales Suárez-Varela MM, Jiménez López MC, Llopis González A. La mortalidad por cáncer de mama entre provincias en relación con factores socioeconómicos, tasa de natalidad y edad del primer embarazo a término (1989-1997). Oncologia. 2003;26:25-31.

Morales Suárez-Varela MM, Jiménez López MC, Llopis González A. Socioeconomic factors and cervical cancer mortality in Spain during the period 1989-1997. Arch Gynecol Obstet. 2004; 269:99-103.

Navalpotro L, Regidor E, Ortega P, et al. Area-based socioeconomic environment, obesity risk behaviours, area facilities and childhood overweight and obesity: Socioeconomic environment and childhood overweight. Prev Med. 2012;55:102-7.

Navarro López V, Benach de Rovira J. Desigualdades sociales de salud en España. Informe de la Comisión Científica de estudios de las desigualdades sociales de salud en España. Rev Esp Salud Pública. 1996;70:505-636.

Navas Martínez JL, Fernández Crehuet-Navajas R, de Irala Estévez J, et al. Mortalidad por suicidio en España: factores socioeconómicos y ambientales. Aten Primaria. 1997;19:250-6.

Nebot Adell M, Canela Soler J, Vallés Segalés A. Evolución de la fecundidad adolescente y su asociación con la evolución de la renta en las provincias españolas en el periodo 1975-1985. Rev San Hig Púb. 1992;66:157-67.

Nebot M, Díez E, Benaque A, et al. Maternidad en adolescentes en los distritios y barrios de Barcelona: asociación con el nivel socioeconómico y prevalencia de bajo peso al nacer. Aten Primaria. 1997;19:449-54.

Nebot M, Borrell C, Villalbi JR. Adolescent motherhood and socioeconomic factors: An ecologic approach. Eur J Public Health. 1997;7:144-8.

Nolasco A, Melchor I, Pina JA, et al. Preventable avoidable mortality: evolution of socioeconomic inequalities in urban areas in Spain, 1996-2003. Health Place. 2009;15:702-11.

Ocaña-Riola R, Sánchez-Cantalejo C, Rosell J, et al. Socio-economic level, farming activities and risk of cancer in small areas of Southern Spain. Eur J Epidemiol. 2004;19: 643-50.

Ocaña-Riola R, Sánchez-Cantalejo C, Fernández-Ajuria A. Rural habitat and risk of death in small areas of Southern Spain. Soc Sci Med. 2006;63:1352-62.

Ocaña-Riola R, Saurina C, Fernández-Ajuria A, et al. Area deprivation and mortality in the provincial capital cities of Andalusia and Catalonia (Spain). J Epidemiol Community Health. 2008;62: 147-52.

Palladino C, Bellón JM, Pérez-Hoyos S, et al. Spatial pattern of HIV-1 mother-to-child-transmission in Madrid (Spain) from 1980 till now: demographic and socioeconomic factors. AIDS . 2008;22:2199-205.

Pasarín M, Borrell C, Plasencia A. ¿Dos patrones de desigualdades sociales en mortalidad en Barcelona?. Gac Sanit. 1999;13:431-40.

Pasarín MI, Borrell C, Brugal MT, et al. Weighing social and economic determinants related to inequalities in mortality. J Urban Health. 2004;81:349-62.

Pascual C, Regidor E, Gutiérrez-Fisac JL, et al. Bienestar material de la provincia de residencia e inactividad física. Gac Sanit. 2005;19:424-32.

Pascual C, Regidor E, Astasio P, et al. The association of current and sustained area-based adverse socioeconomic environment with physical inactivity. Soc Sci Med. 2007;65: 454-66.

Pascual C, Regidor E, Martínez D, et al. Socioeconomic environment, availability of sports facilities, and jogging, swimming and gym use. Health Place. 2009;15:553-61.

Peiró S, Meneu R, Bernal-Delgado E. Variabilidad, efectividad y desigualdad. Histerectomías y prostatectomías por enfermedad neoplásica en España (2002-2004). Rev Esp Salud Pública. 2009;83:109-21.

Pérez de Lucas N, Gil Miguel A, Sánchez A, et al. Estudio epidemiológico de la fecundidad en adolescentes en la Comunidad Autónoma de Madrid. Aten Primaria. 1993;12:139-43.

Pollán M, Ramis R, Aragonés N, et al. Municipal distribution of breast cancer mortality among women in Spain. BMC Cancer. 2007;7:78.

Portella E, Castillo A. Aspectos sociales del embarazo en adolescentes. Gac Sanit. 1988;2:150-3.

Puigpinós-Riera R, Marí-Dell’Olmo M, Gotsens M, et al. Cancer mortality inequalities in urban areas: a Bayesian small area analysis in Spanish cities. Int J Health Geogr. 2011;10:6.

Ramis R, Diggle P, Cambra K, et al. Prostate cancer and industrial pollution Risk around putative focus in a multi-source scenario. Environ Int. 2011;37:577-85.

Ramis R, Diggle P, Boldo E, et al. Analysis of matched geographical areas to study potential links between environmental exposure to oil refineries and non-Hodgkin lymphoma mortality in Spain. Int J Health Geogr. 2012;11:4.

Regidor E, Calle ME, Navarro P, et al. Trends in the association between average income, poverty and income inequality and life expectancy in Spain. Soc Sci Med. 2003;56:961-71.

Regidor E, Pascual C, Calle ME, et al. Incremento de la diferencia en la supervivencia según la renta per cápita en España en los últimos años del siglo XX. Gac Sanit. 2003;17:404-8.

Regidor E, Lostao L, Pascual C, et al. Income in large residential areas and premature mortality in six countries of the European Union. Health Policy. 2005;75:99-108.

Regidor E, Martínez D, Astasio P, et al. Evolución de las desigualdades socioeconómicas y las desigualdades en la percepción de la salud en España Gac Sanit. 2006;20:178-82.

Regidor E, Martínez D, Astasio P, et al. Asociación de los ingresos económicos con la utilización y la accesibilidad de los servicios sanitarios en España al inicio del siglo XXI. Gac Sanit. 2006;20:352-9.

Regidor E, Ronda E, Pascual C, et al. Decreasing socioeconomic inequalities and increasing health inequalities in Spain: a case study. Am J Public Health. 2006;96: 102-8.

Regidor E, de la Fuente L, Martínez D, et al. Heterogeneity in cause-specific mortality according to birthplace in immigrant men residing in Madrid, Spain. Ann Epidemiol. 2008;18: 605-13.

Regidor E, Gutiérrez-Fisac JL, Ronda E, et al. Impact of cumulative area-based adverse socioeconomic environment on body mass index and overweight. J Epidemiol Community Health. 2008;62:231-8.

Regidor E, Sánchez E, de la Fuente L, et al. Major reduction in AIDS-mortality inequalities after HAART: the importance of absolute differences in evaluating interventions. Soc Sci Med. 2009;68:419-26.

Ridao-López M, García-Armesto S, Abadía-Taira B, et al. Income level and regional policies, underlying factors associated with unwarranted variations in conservative breast cancer surgery in Spain. BMC Cancer. 2011;11:145.

Rivas-Ruiz F, Perea-Milla E, Jiménez-Puente A. Geographic variability of fatal road traffic injuries in Spain during the period 2002-2004: an ecological study. BMC Public Health. 2007;7:266.

Rodríguez Artalejo F, Banegas JR, García Colmero C, et al. Lower consumption of wine and fish as a possible explanation for higher ischaemic heart disease mortality in Spain's Mediterranean Region. Int J Epidemiol. 1996;25:1196-201.

Rodríguez Artalejo F, Guallar-Castillón P, Gutiérrez-Fisac JL, et al. Socioeconomic level, sedentary lifestyle, and wine consumption as possible explanations for geographic distribution of cerebrovascular disease mortality in Spain. Stroke. 1997;28:922-8.

Rodríguez Ortiz de Salazar B, Martín Galilea MJ. Variabilidad en la utilización de recursos en atención primaria. Aten Primaria. 1999;23:110-5.

Rodríguez-Rieiro C, Rodríguez-Pérez P, Granado de la Orden S, et al. In-hospital mortality rates after CABG by autonomous regions in Spain. Int J Health Care Qual Assur. 2011; 24:300-7.

Rodríguez-Sanz M, Borrell C, Urbanos R, et al. Power relations and premature mortality in Spain's autonomous communities. Int J Health Serv. 2003;33:687-722.

Ruiz Mariscal I, March Cerda JC. Desigualdades en salud en los municipios periféricos de la Aglomeración Urbana de Granada. Aten Primaria. 1998;22:269-78.

Ruiz Muñoz D, Pérez G, Gotsens M, et al. Regional inequalities in the use of contraception in Spain: a multilevel approach. Health Place. 2012;18:408-14. Corrigendum. Health Place. 2012;18:934.

Ruiz-Ramos M, Sánchez J, Garrucho G, et al. Desigualdades en mortalidad en la ciudad de Sevilla. Gac Sanit. 2004;18:16-23.

Ruiz-Ramos M, Escolar Pujolar A, Sánchez Perea J, et al. Evolución de las desigualdades sociales en la mortalidad general de la ciudad de Sevilla (1994-2002). Gac Sanit. 2006;20: 303-10.

Salcedo N, Saez M, Bragulat B, et al. Does the effect of gender modify the relationship between deprivation and mortality? BMC Public Health. 2012;12:574.

Salleras L, Sentis J, Canela J, et al. Facteurs sociaux et d’assistance sanitaire et mortalité périnatale en Espagne. Etude écologique. Rev Epidém et Santé Publ. 1988;36:30-5.

Sarría Santamera A, Franco Vidal A, Redondo Martín S, et al. Hospitalizaciones en menores de un año en la ciudad de Madrid y su relación con el nivel social y la mortalidad infantil. An Esp Pediatr. 2002;573:220-6.

Saurina C, Saez M, Marcos-Gragera R, et al. Effects of deprivation on the geographical variability of larynx cancer incidence in men, Girona (Spain) 1994-2004. Cancer Epidemiol. 2010;34: 109-15.

Segura del Pozo J, Gandarillas A, Domínguez-Berjón F, et al. Chronic liver disease and cirrhosis mortality and social deprivation: a spatial analysis in small areas of Madrid region. Nutr Hosp. 2010;25:597-605.

Segura Noguera JM, Sanz Carreras F, Bastida Bastús N, et al. Descripción y validación de un modelo predictivo de la distribución geográfica de los enfermos crónicos domiciliarios. Aten Primaria. 1996; 17:292-4

Simo Miñana J. El gasto sanitario en España, 1995-2002. La atención primaria, Cenicienta del Sistema Nacional de Salud. Aten Primaria. 2007;39:127-32.

Simo Miñana J. El gasto sanitario en España, 2002-2008: ¿empieza el rescate presupuestario de la atención primaria? Aten Primaria. 2012;44: 20-29.

Stoyanova A, Diaz-Serrano L. El impacto diferencial del capital social sobre la salud mental de la población autóctona y los inmigrantes residentes en Cataluña. Gac Sanit. 2009; 23 (Supl 1):93-99.

Tangüis HG, Caylà J, García de Olalla PG, et al. Factors predicting non-completion of tuberculosis treatment among HIV-infected patients in Barcelona (1987-1996). Int J Tuberc Lung Dis. 2000;4:55-60.

Torralba L, Brugal MT, Villalbi JR, et al. Mortality due to acute adverse drug reactions: opiates and cocaine in Barcelona, 1989-93. Addiction. 1996;91:419-26.

Valero C, Nebot M, Villalbi JR. Embarazo en adolescentes en Barcelona: distribución, antecedentes y consecuencias. Gac Sanit. 1994;8:155-61.

van Lenthe FJ, Borrell LN, Costa G, et al. Neighbourhood unemployment and all cause mortality: a comparison of six countries. J Epidemiol Community Health. 2005;59:231-7.

Vioque J, Egea CM, Porta M. Stomach cancer mortality in Spain: an ecological analysis of diet, altitude, latitude, and income. J Epidemiol Community Health. 1995;49:441-2.

Vioque J, Fenollar J. Distribución de la mortalidad por cáncer de cérvix en España (1981-1986). Un estudio ecológico. Med Clin (Barc). 1995;104:287-92.

Vioque J, Ferrer PJ, Bolumar F. Renta per cápita, población rural femenina, promedio de hijos y distribución provincial de la mortalidad por cáncer de mama en España, 1975-1991]. Med Clin (Barc). 1997;108:41-44.
